# Supplementary material for: Pancreas-enriched miRNA refines endocrine cell differentiation
Source: Oxford University Press journal article supplement (doi:10.1242/dev.080127), 2012-07-05
Supplement: dev080127tables2.pdf [file dev080127tables2.pdf]

**Table S2. Primers and oligos used in this study**

| <b>Reverse primer</b>        | <b>Forward primer</b>                        | <b>Gene name</b>                          |
|------------------------------|----------------------------------------------|-------------------------------------------|
| ACTTGGACGGGAACTGACAC         | AACAACCTGCCTATGCAA CC                        | Pax6                                      |
| TGCAGTAGTTCTCCAGCTGG         | CCTGTTGGTGCACCTCCTAC                         | Insulin                                   |
| TTTGAAATTGTACATCCCAAGT<br>AC | AAACCAAGATCACTGACAAGAAAT<br>AGGT             | Glucagon                                  |
| GTGGCTGCAGTTTAGCTGGT         | CAGGCTCCAGCTTCCTGA                           | Ghrelin                                   |
| GTAGGCAGTACGGGTCCTCT         | TTCCCGAATGGAACCGAGC                          | Pdx1                                      |
| TGAGGAGGAAGCCACAGGAA         | ACCTCATCCCAGGCCTATCTC                        | Pax4                                      |
| GACCCACTCCCTGGAATGGA         | CAGATCGGCAGCACCTTTGAA                        | Cpa1                                      |
| GTAGCAGTATTCGTGTAGCTGG       | TCCCATCCCCTTACTTTGATGA                       | Ptfla                                     |
| AAGATGGTGATGGGCTTCCCG        | TGGCAAAGTGGAGATTGTTGCC                       | Gapdh                                     |
| TGGCCTGTATCCAACACTTCGAG<br>A | CTGGTTAAGCAGTACAGCCCCAAA                     | Hprt                                      |
| ACTCCCTGTCCCTGCCATG          | CGTCCTTCCTCCCTCTAGCTC                        | MafB                                      |
| AGGATGTTGAGCTGCGTGAG         | CAGCATTGGCAGGCTCT                            | Arx                                       |
|                              | ApsCpsAACAAAAUCACUAGUCUUps<br>CpsCpsAps-Chol | Anti-miR-7<br>antagomir (2'<br>OMe)-chl   |
|                              | ApsCpsAAACACCAUUGUCACACUpsC<br>psCpsAps-Chol | Anti-miR-<br>122 antagomir<br>(2'OMe)-chl |
|                              | ACCAUGAUCGACAAGAUUUGCCAT                     | siPax6                                    |
