# Supplementary figures and images for: Pancreas-enriched miRNA refines endocrine cell differentiation
Source: Oxford University Press journal article supplement (doi:10.1242/dev.080127), 2012-07-05

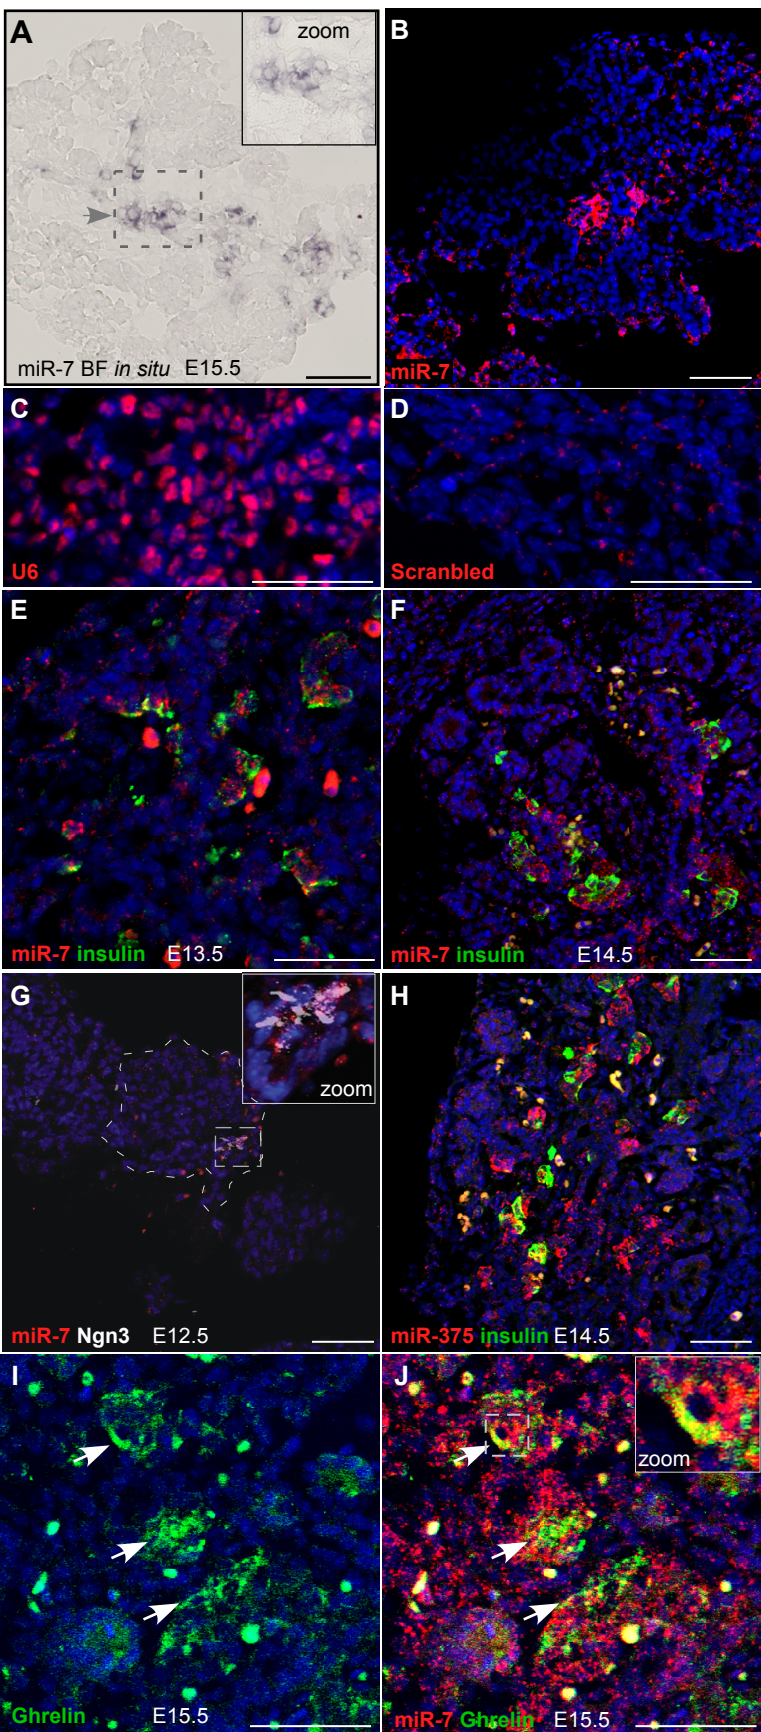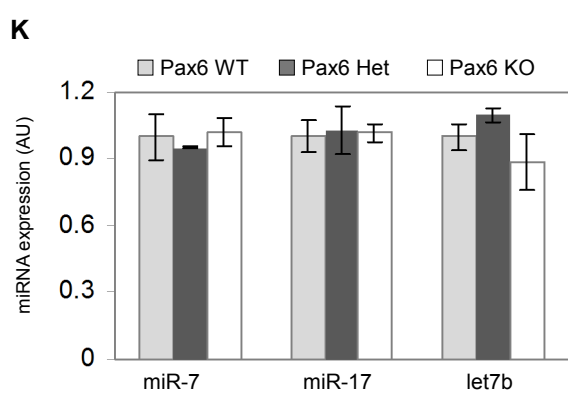

Supplement: dev080127figs1.pdf [file dev080127figs1.pdf]

**A**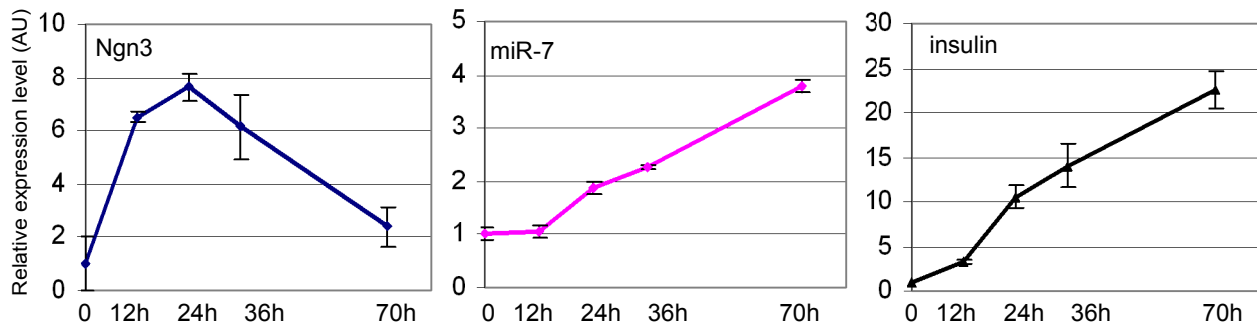**B**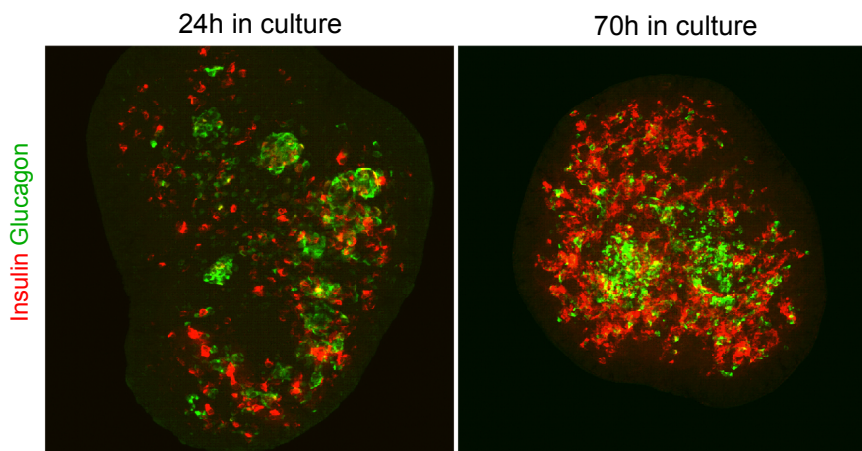**C**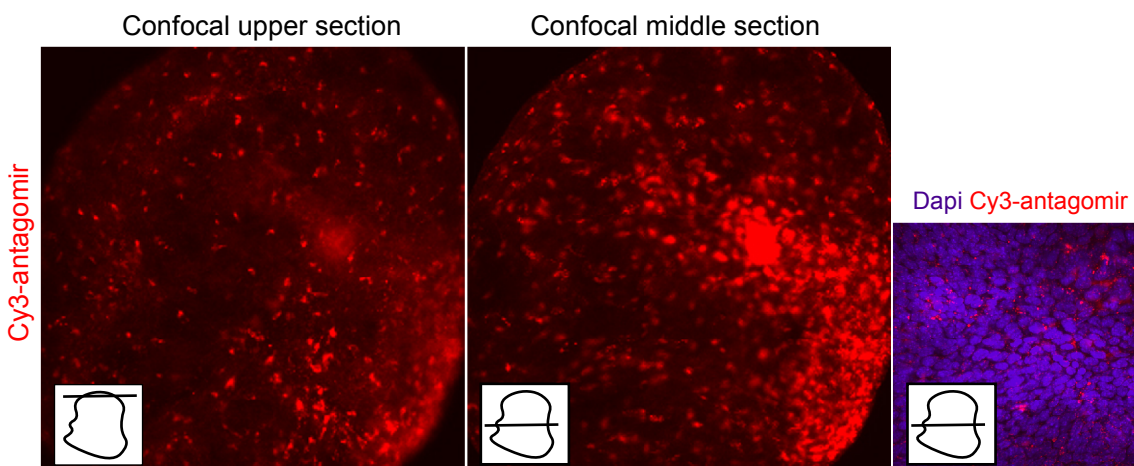**D**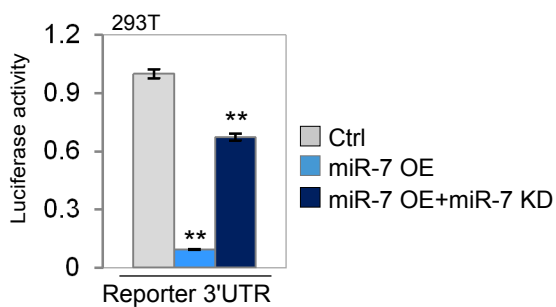

Supplement: dev080127figs2.pdf [file dev080127figs2.pdf]

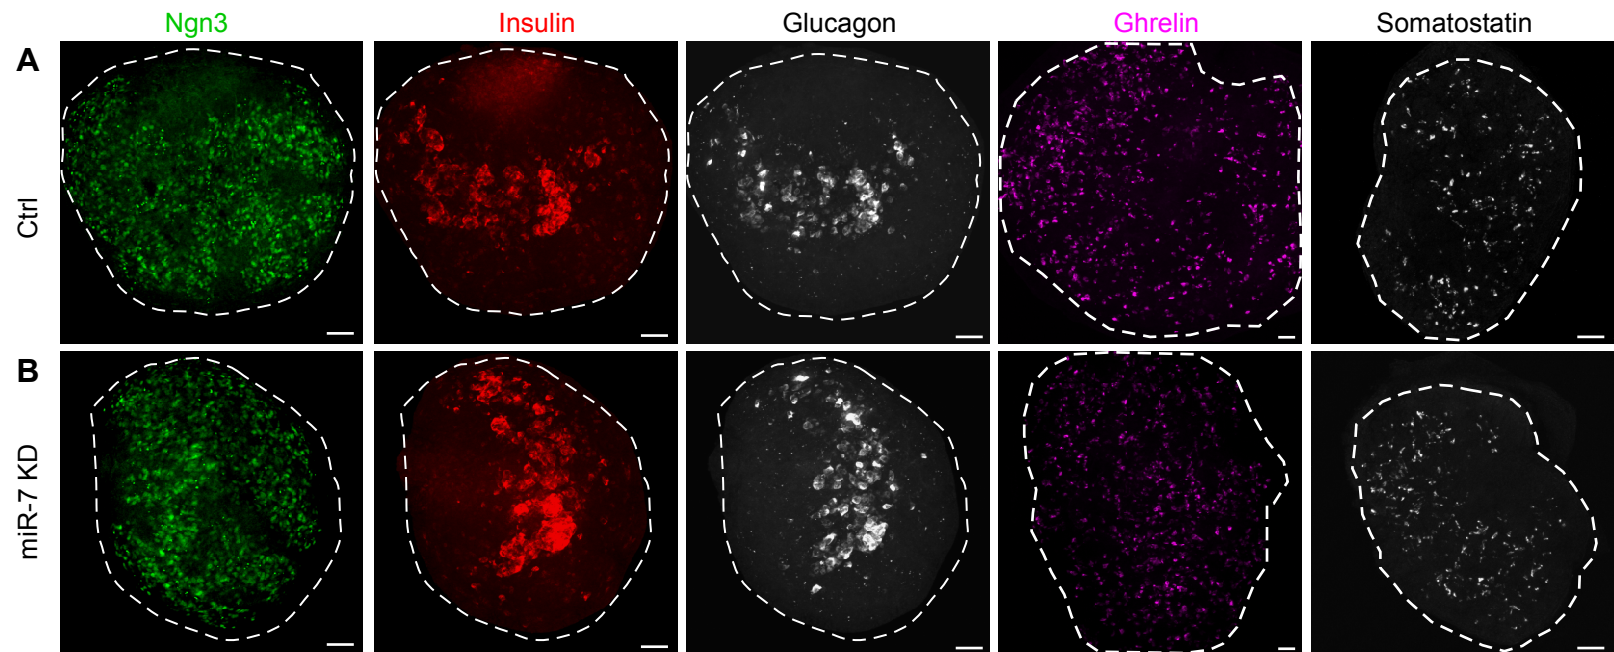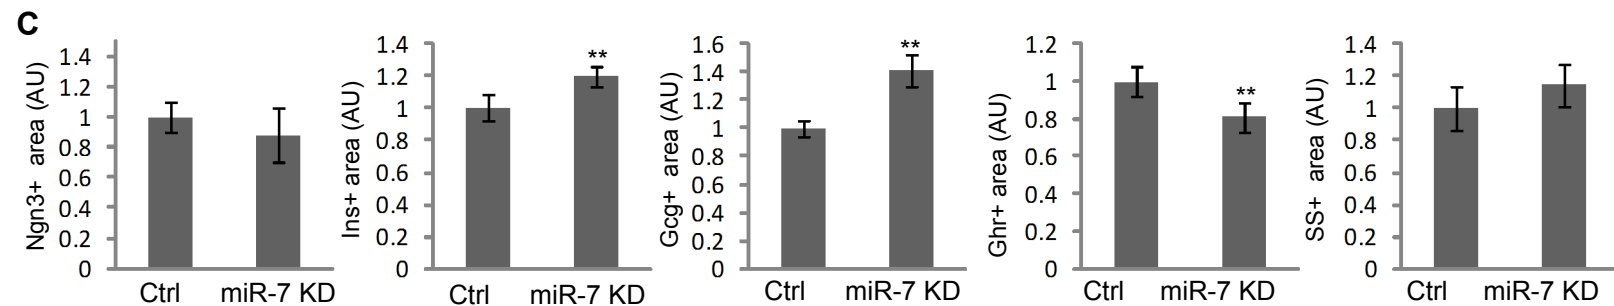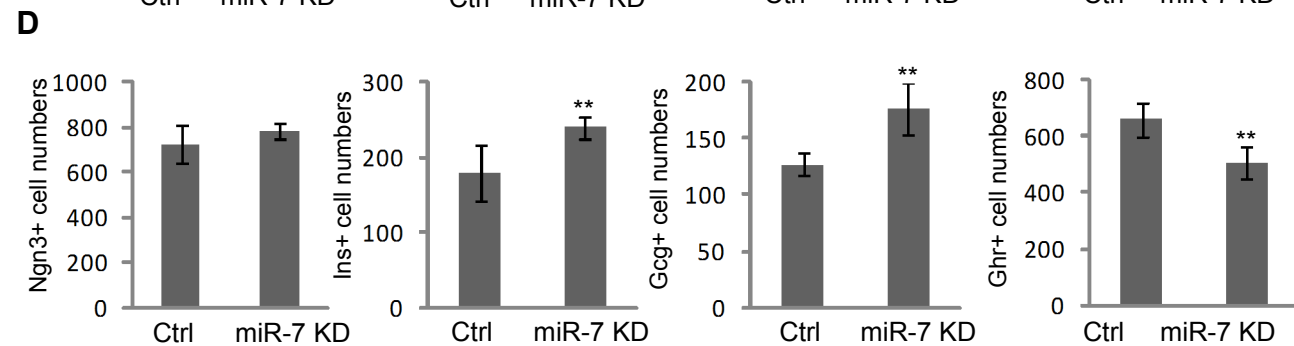

Supplement: dev080127figs3.pdf [file dev080127figs3.pdf]

Ctrl

miR-7 KD

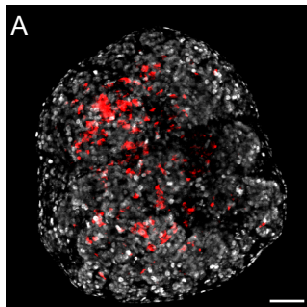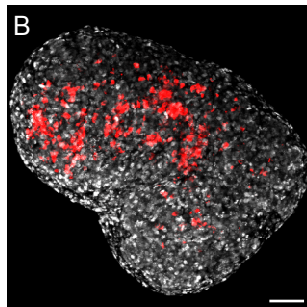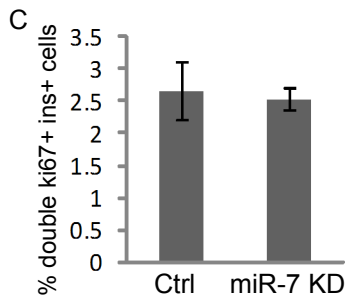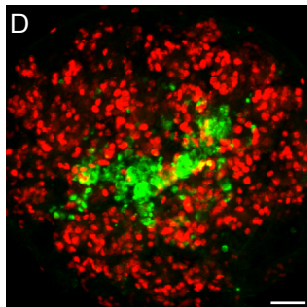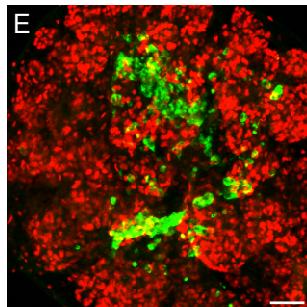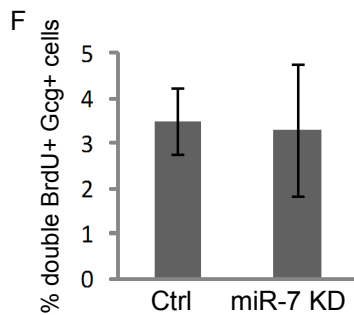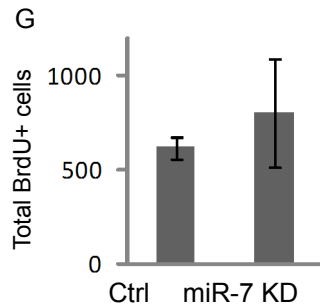

Supplement: dev080127figs4.pdf [file dev080127figs4.pdf]

**A**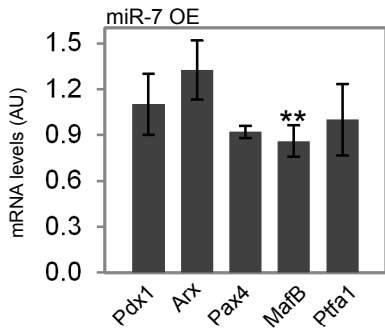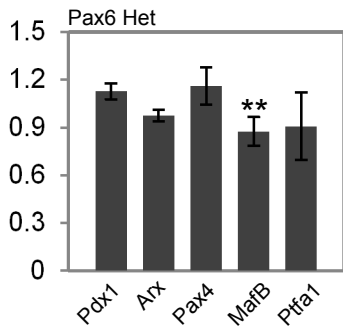**B**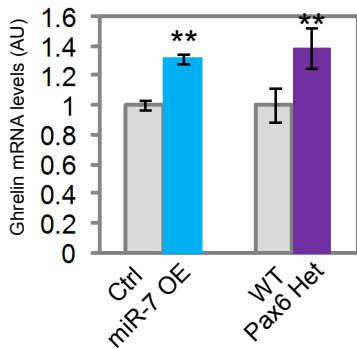**C**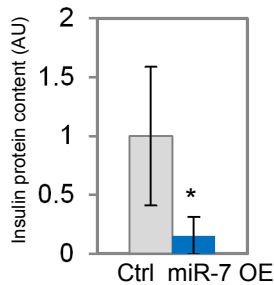

Supplement: dev080127figs5.pdf [file dev080127figs5.pdf]
